# Supplementary material
Source: Royal Society of Chemistry journal article supplement (doi:10.1039/d5fo05533d)
Supplement: d5fo05533d1.pdf [file d5fo05533d1.pdf]

Supplementary Material to:

---

**Plant-protein Stabilized Emulsions as  $\beta$ -carotene Delivery Systems: Colloidal Stability and Behaviour during *in vitro* Digestion Conditions**

**Mohsen Ramezani**<sup>1,2</sup>, **Marga Amengual Ramon**<sup>1</sup>, **Laura Salvia-Trujillo**<sup>1,2</sup>, **Olga Martin-Belloso**<sup>\*1,2</sup>

<sup>1</sup>. Department of Food Technology, Engineering and Science. University of Lleida, Av. Alcalde Rovira Roure 191, 25198. Lleida, Spain

<sup>2</sup>. Agrotecnio Center, Av. Alcalde Rovira Roure 191, 25198. Lleida, Spain

\* Corresponding Author

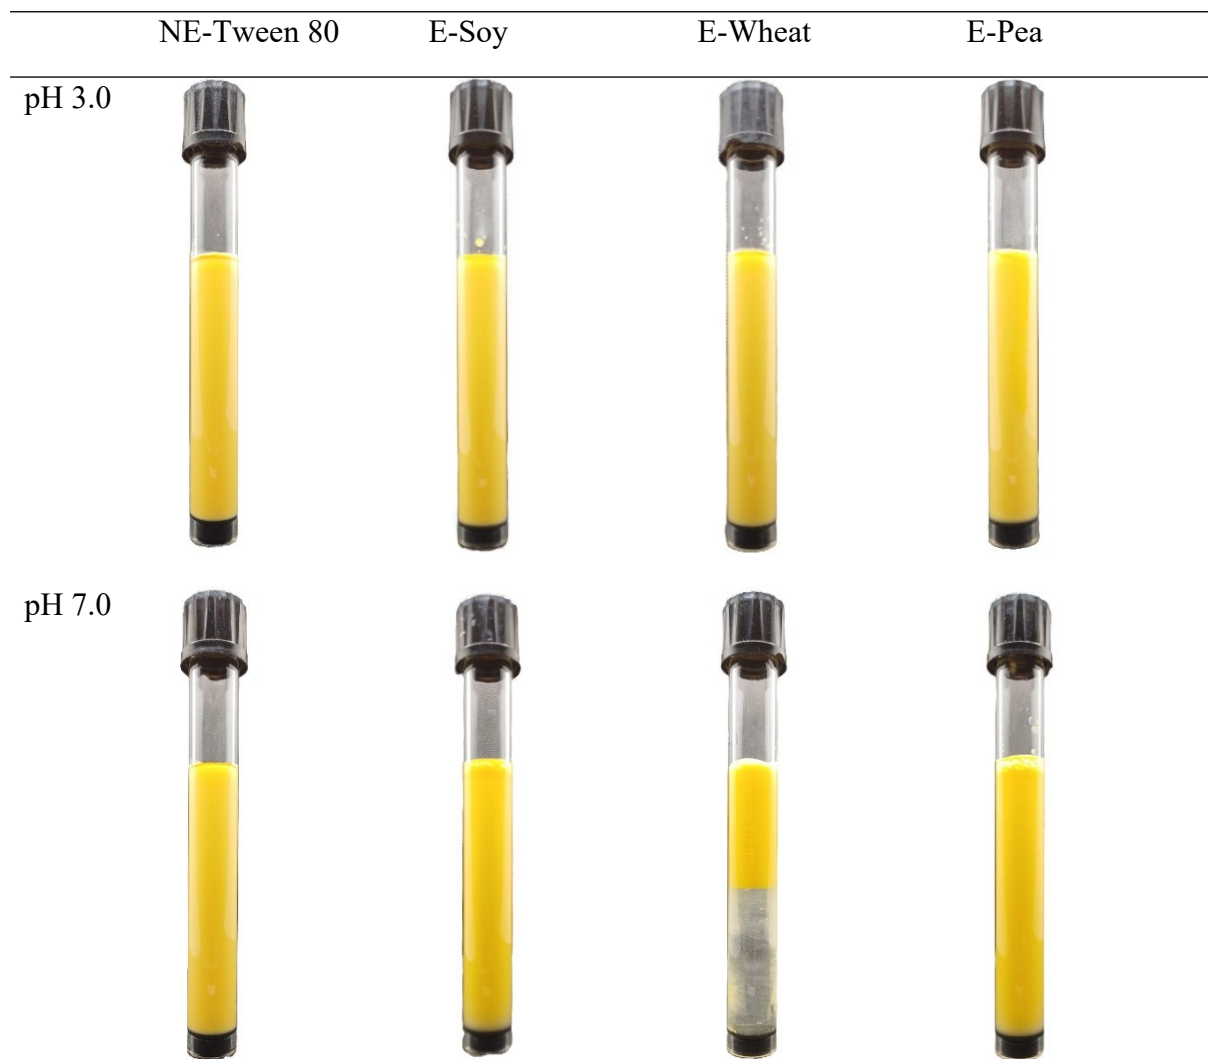

Figure S1. The visual appearance of nanoemulsions (NE-) and emulsions (E-) after 24 hours stabilized by Tween 80 or plant protein isolates (pea, wheat, soy) at pH 3.0 or pH 7.0.
